# Supplementary material
Source: PubMed Central journal article supplement (PMC3951940)
Supplement: mmc1.pdf [file mmc1.pdf]

**The American Journal of Human Genetics, Volume 94**

**Supplemental Data**

## **A Common 16p11.2 Inversion Underlies the Joint Susceptibility to Asthma and Obesity**

**Juan R. González, Alejandro Cáceres, Tonu Esko, Ivon Cuscó, Marta Puig, Mikel Esnaola,  
Judith Reina, Valerie Siroux, Emmanuelle Bouzigon, Rachel Nadif, Eva Reinmaa, Lili  
Milani, Mariona Bustamante, Deborah Jarvis, Josep M. Antó, Jordi Sunyer, Florence  
Demenais, Manolis Kogevinas, Andres Metspalu, Mario Cáceres, and Luis A. Pérez-Jurado**

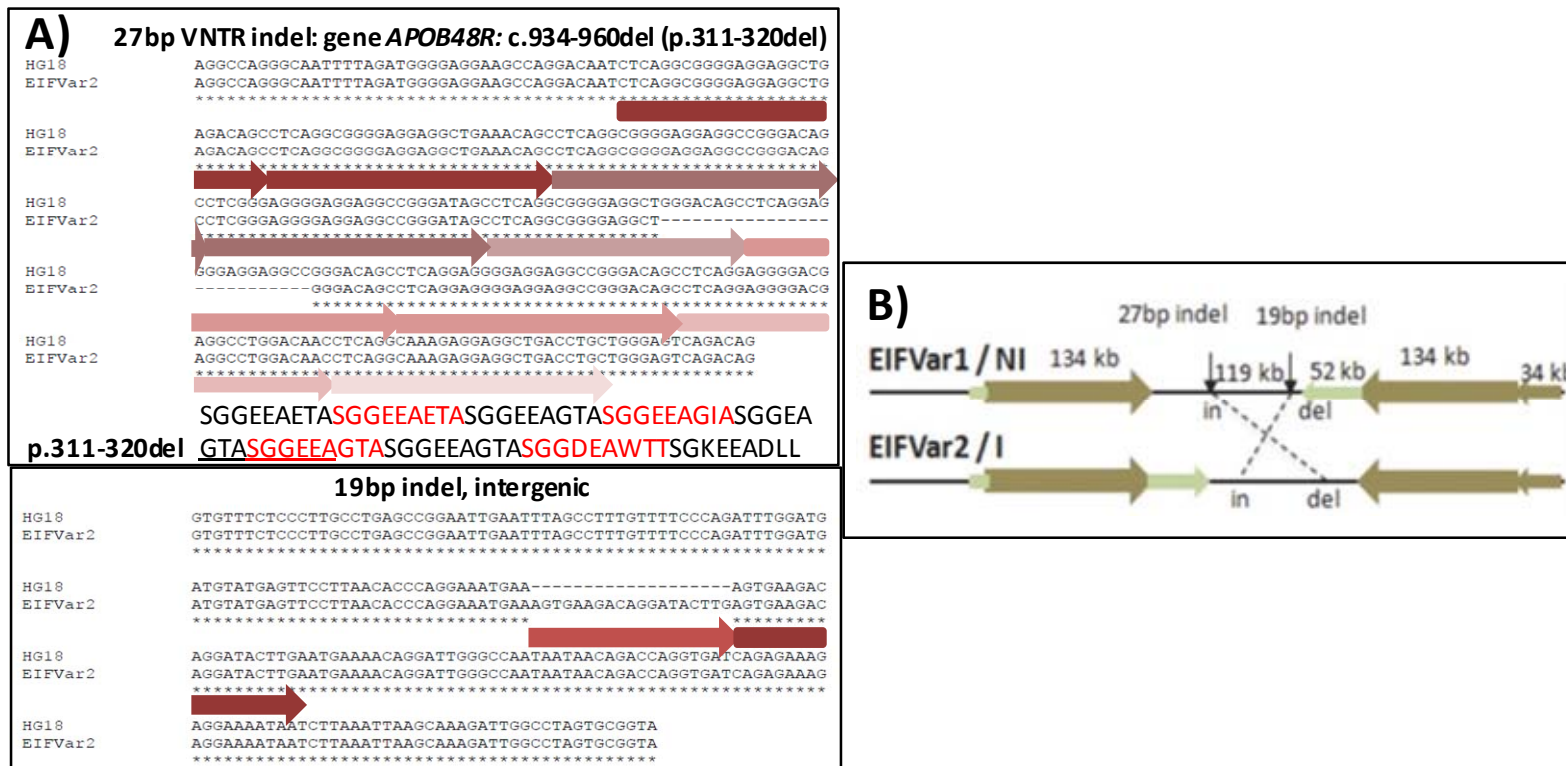

**Figure S1. Identification of additional haplotype markers for the NI and I alleles.** A) Sequence alignment of the reference haplotype (EIFVar1) and EIFVar2 at the two insertion-deletion polymorphisms. The arrows under the alignments show the 27bp or 19bp repeats in each sequence. The 27bp deletion in the *APOB48R* gene present in the EIFVar2 allele causes the loss of 9 amino acids of this internal repeat in the protein (underlined). B) Schematic representation of the EIFVar1/NI and EIFVar2/I alleles at 16p11.2 with the flanking SDs (inverted dark green arrows) and the single copy interval in between with the size of each region in Kb. Other smaller blocks of SDs are shown in light green. The location of the two insertion-deletion polymorphisms and the specific alleles per haplotype are indicated.

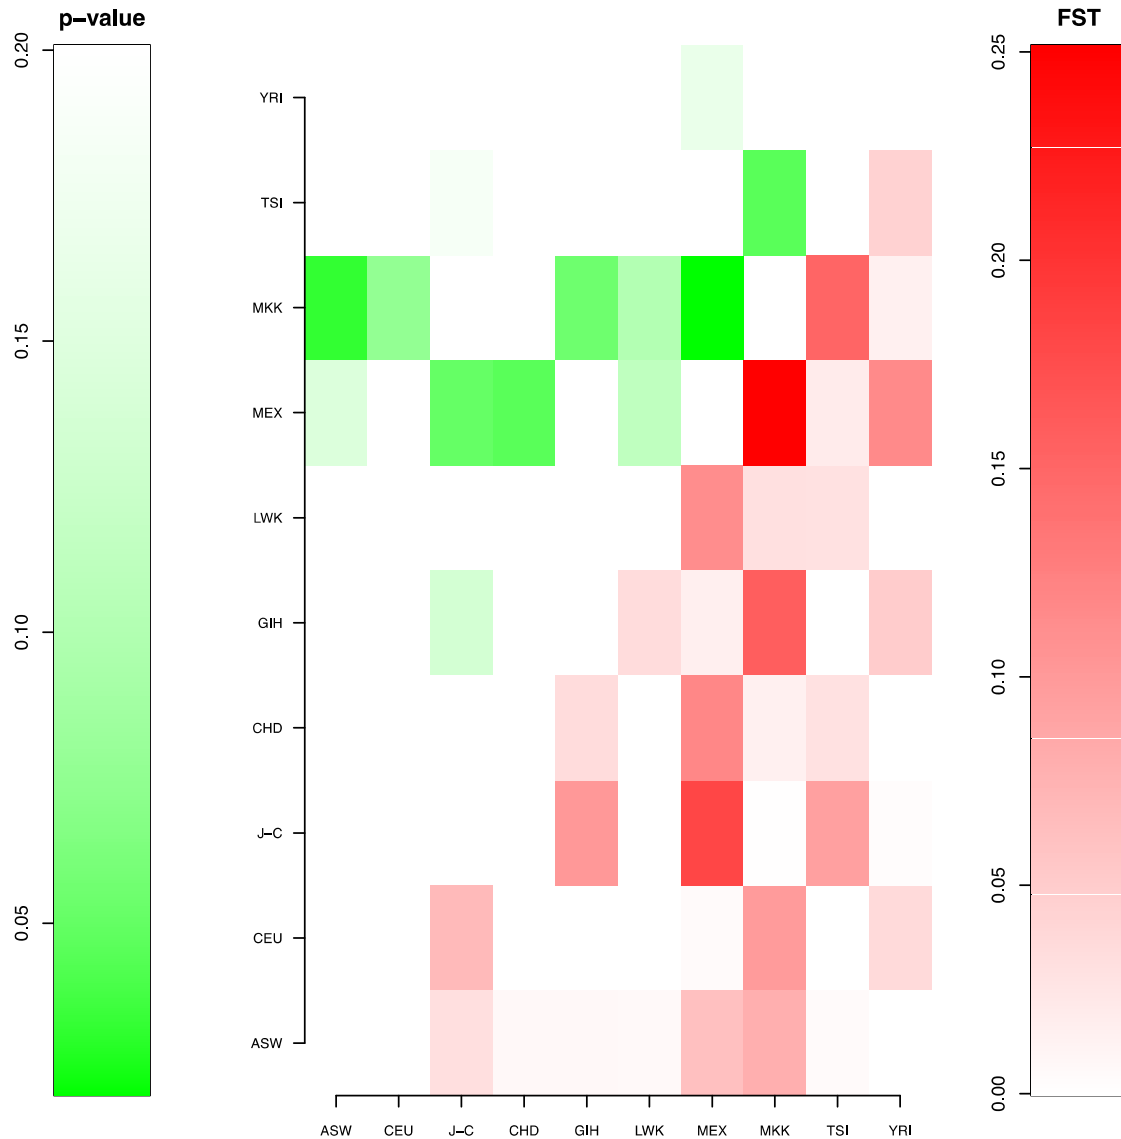

**Figure S2. Population stratification of the 16p11.2 inversion.** Pairwise  $F_{ST}$  between HapMap3 populations based on inversion genotypes and the corresponding significance relative to an empirical distribution of neutral SNPs. Each shaded box represents a pairwise population comparison with higher  $F_{ST}$  in red and the corresponding p-values in green, as indicated by the bars on each side. The following populations are included: ASW: African ancestry in Southwest USA; CEU: Utah residents with Northern and Western European ancestry; CHB: Han Chinese in Beijing, China; CHD: Chinese in Metropolitan Denver, Colorado; GIH: Gujarati Indians in Houston, Texas; JPT: Japanese in Tokyo, Japan; LWK: Luhya in Webuye, Kenya; MEX: Mexican ancestry in Los Angeles, California; MKK: Maasai in Kinyawa, Kenya; TSI: Tuscans in Italy (n=88), YRI: Yoruba in Ibadan, Nigeria.

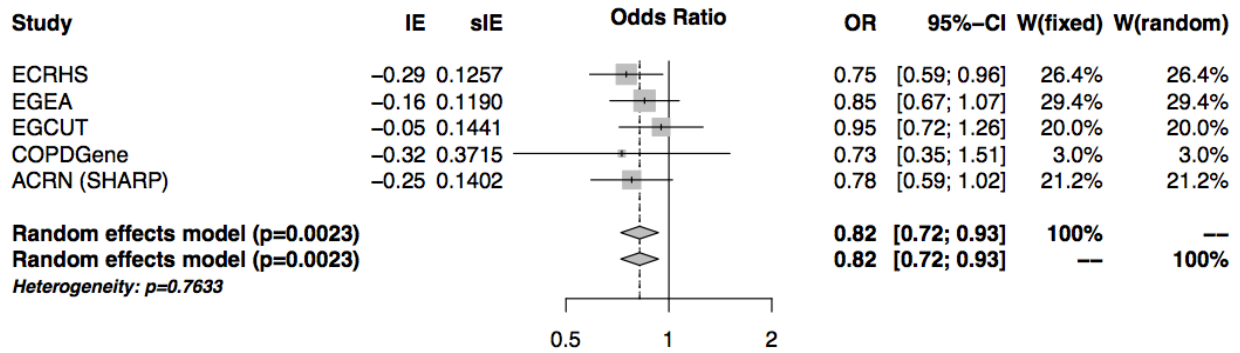

**Figure S3. Meta-analysis forest plot for the association studies of the inversion with asthma alone.** The inversion-allele effect (IE), the standard error of the effect (sIE), the odds ratio (OR) with confidence intervals (95%-CI) and the relative weight (W) corresponding to the inversion allele effect under a dominant model on asthma are shown for each study. Overall, there is a protective effect of the inversion allele for asthma with an OR of 0.82 (p value of 0.0026).

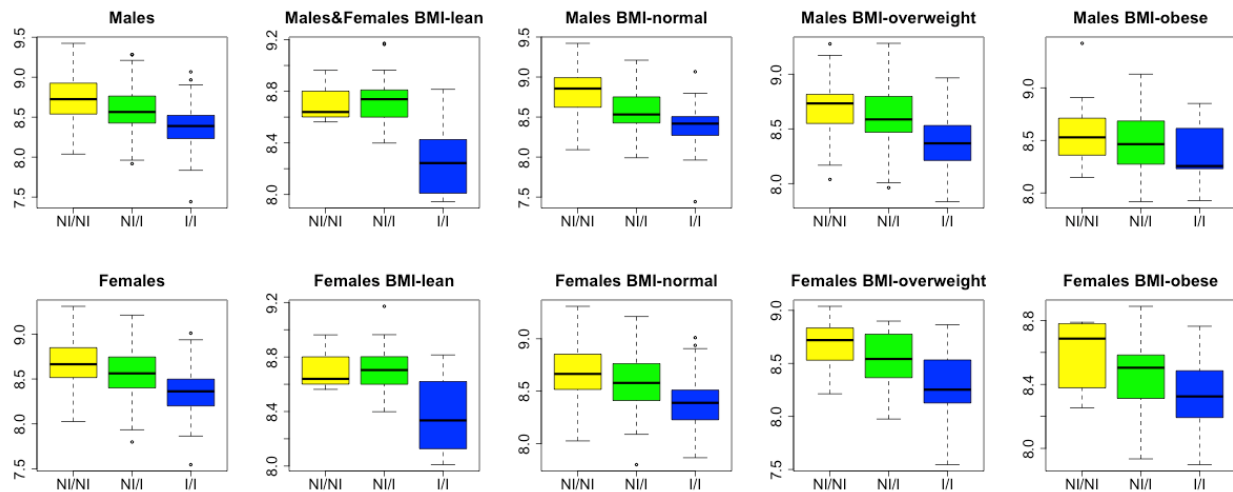

**Figure S4. Expression of the *TUFM* gene in the EGCUT gene expression cohort.** Boxplots of gene expression for each inversion genotype stratified by gender and BMI (lean: <18; normal: [18 – 25); overweight: [25 – 30); obese:  $\geq 30$ ).

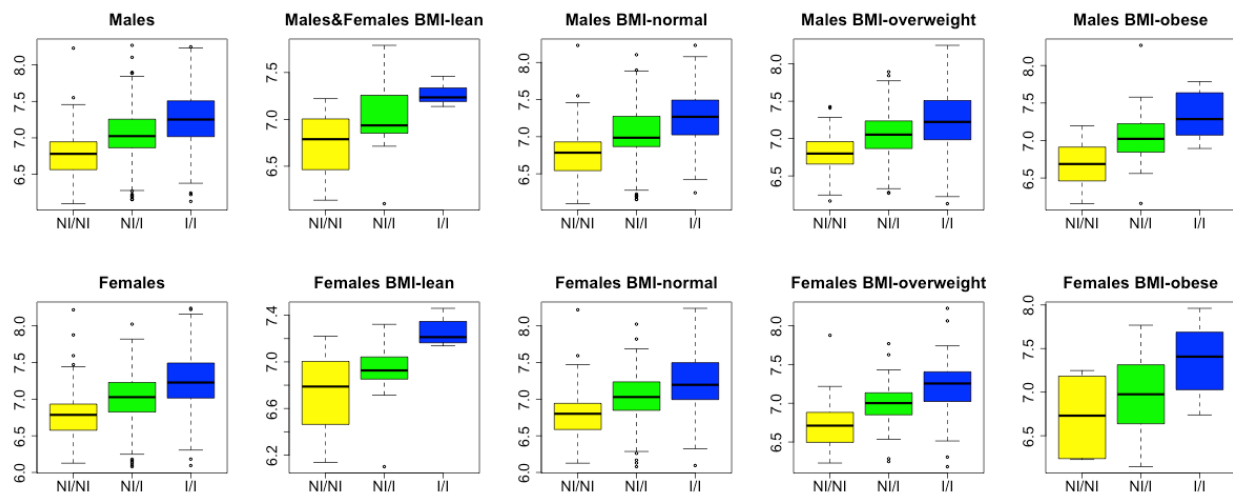

**Figure S5. Expression of the *SULT1A4* gene in the EGCUT gene expression cohort.** Boxplots of gene expression for each inversion genotype stratified by gender and BMI (lean: <18; normal: [18 – 25); overweight: [25 – 30); obese:  $\geq 30$ ).

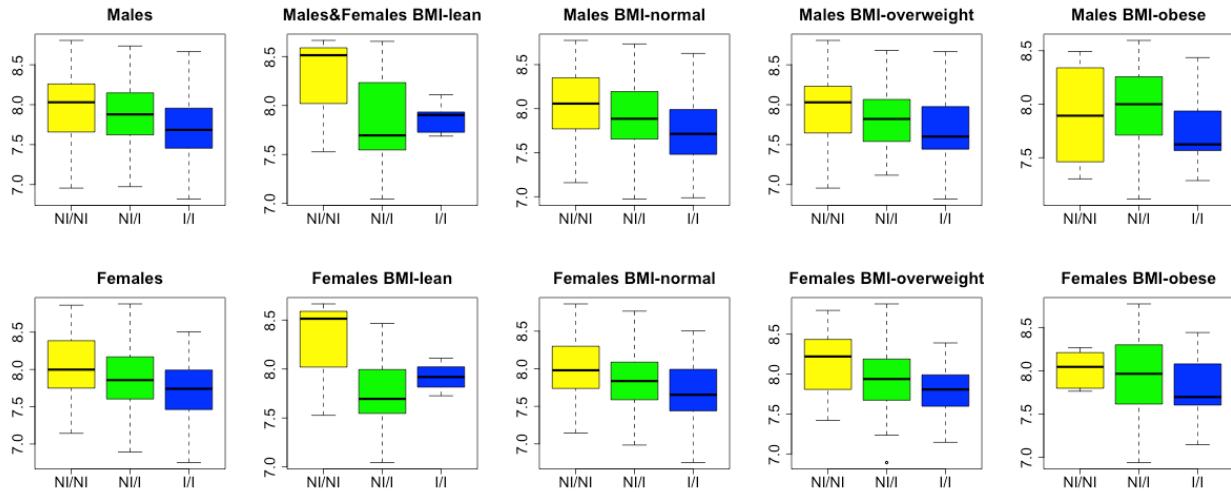

**Figure S6. Expression of the *SNPS1* gene in the EGCUT gene expression cohort.** Boxplots of gene expression for each inversion genotype stratified by gender and BMI (lean: <18; normal: [18 – 25); overweight: [25 – 30); obese:  $\geq 30$ ).

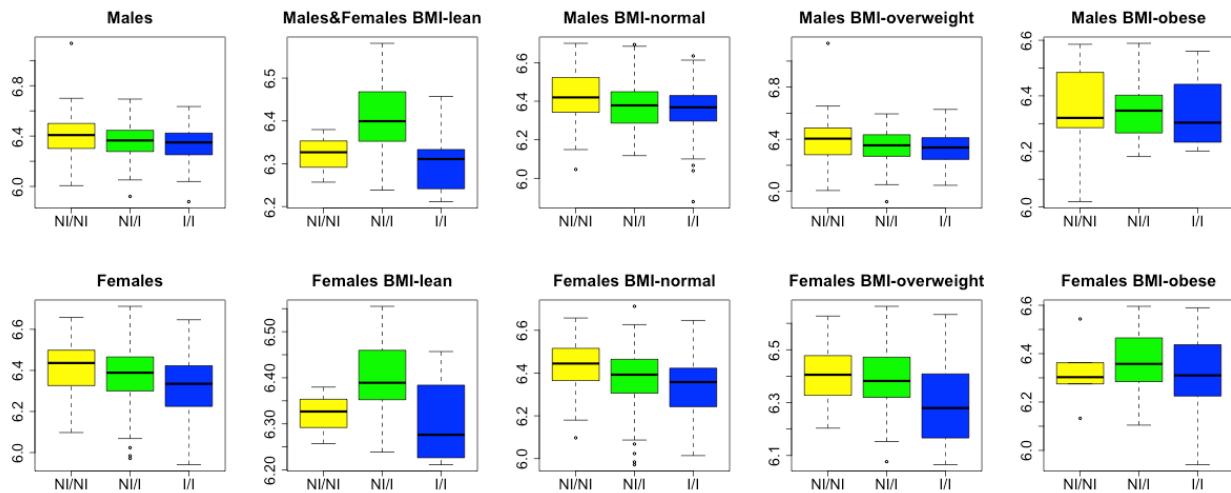

**Figure S7. Expression of the *SULT1A1* gene in the EGCUT gene expression cohort.** Boxplots of gene expression for each inversion genotype stratified by gender and BMI (lean: <18; normal: [18 – 25); overweight: [25 – 30); obese:  $\geq 30$ ).

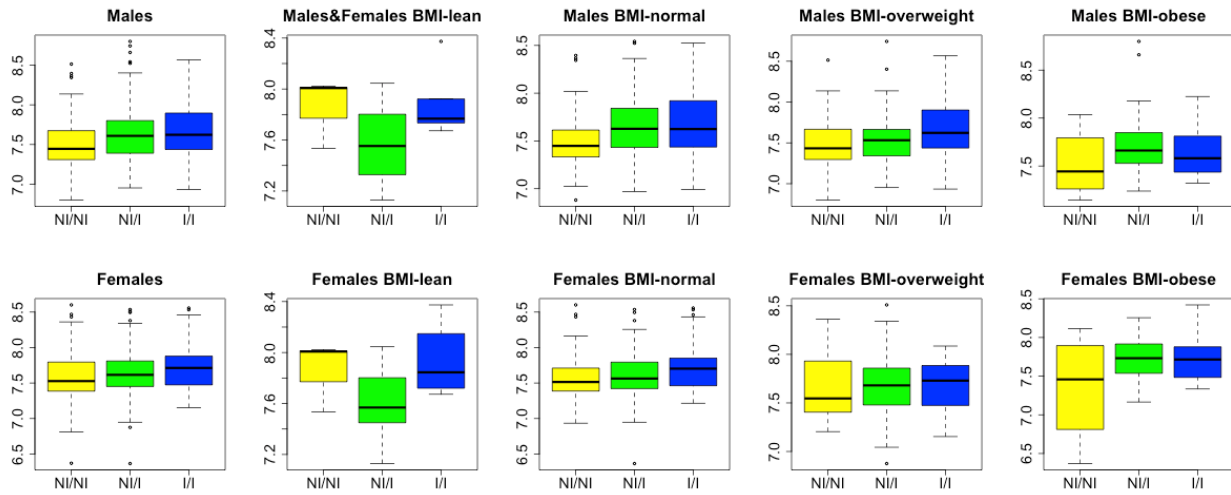

**Figure S8. Expression of the *CCDC101* gene in the EGCUT gene expression cohort.** Boxplots of gene expression for each inversion genotype stratified by gender and BMI (lean: <18; normal: [18 – 25); overweight: [25 – 30); obese:  $\geq 30$ ).

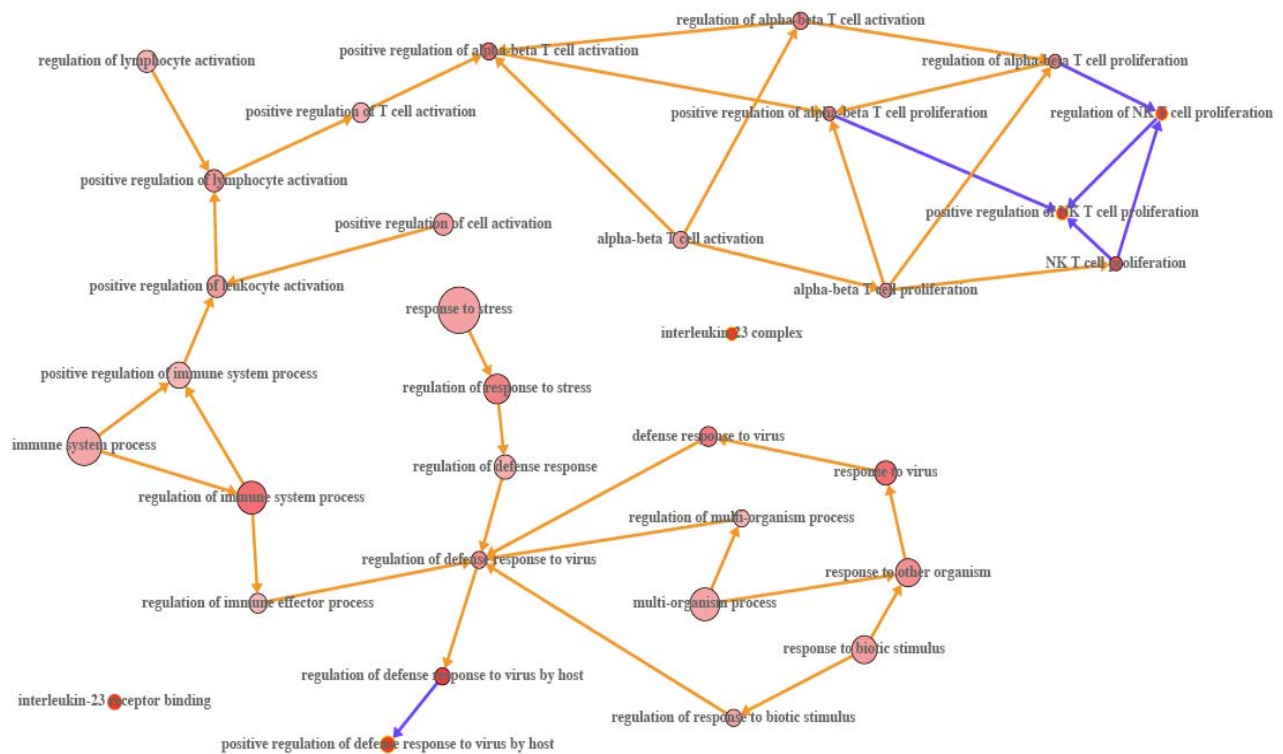

**Figure S9. Concept-network resulting from the GO enrichment analysis of transcriptome data from lymphoblastoid cell lines.** Gene Ontology (GO) enrichment analysis was performed including those genes (from the whole genome) that were differentially expressed with respect to the inversion at a false discovery rate  $< 10^{-3}$ . A concept-network using GeneAnswers bioconductor package was then estimated. Nodes represent the different categories to which the most expressed genes belong, while edges encode relationships between categories. The size of a node is proportional to the number of genes in its GO category. Likewise, the color stands for how relative the given genes are to the GO categories (the redder, the more relative). Finally, dark purple edges indicate the most representative connections between the GO categories.



| <b>Study</b>   | <b>Frequency</b> | <b>Kappa</b> | <b>% of variance</b> |
|----------------|------------------|--------------|----------------------|
| EGCUT          | 0.49             | 0.96         | 90.00                |
| HapMap 3 CEU   | 0.36             | 0.97         | 95.30                |
| ECRHS-I        | 0.40             | 0.95         | 92.30                |
| EGEA           | 0.34             | 0.97         | 92.90                |
| COPDgene-SHARP | 0.36             | 0.96         | 94.40                |

**Table S1: Frequency of the 16p11.2 inversion polymorphism in the different cohorts included in the analyses.** The first column provides the frequency of the inversion, the second shows the concordance of calls between inVeRsion and PFIDO algorithms, and the last column indicates the percentage (%) of variance captured by the inversion.

| Population | DNA     | PFIDO/inveRision genotype | 19-bp indel | 27-bp indel |
|------------|---------|---------------------------|-------------|-------------|
| CEU        | NA07029 | NI/NI                     | -           | +           |
| CEU        | NA10856 | NI/NI                     | -           | +           |
| CEU        | NA12707 | NI/NI                     | -           | +           |
| CEU        | NA12236 | NI/NI                     | -           | +           |
| CEU        | NA12801 | NI/NI                     | -           | +           |
| CEU        | NA12875 | NI/NI                     | -           | +           |
| CHB        | NA18542 | NI/NI                     | -           | +           |
| CHB        | NA18561 | NI/NI                     | -           | +           |
| CHB        | NA18570 | NI/NI                     | -           | +           |
| CHB        | NA18573 | NI/NI                     | -           | +           |
| CHB        | NA18593 | NI/NI                     | -           | +           |
| CHB        | NA18594 | NI/NI                     | -           | +           |
| CHB        | NA18620 | NI/NI                     | -           | +           |
| CHB        | NA18632 | NI/NI                     | -           | +           |
| CHB        | NA18633 | NI/NI                     | -           | +           |
| CHB        | NA18636 | NI/NI                     | -           | +           |
| JPT        | NA18943 | NI/NI                     | -           | +           |
| JPT        | NA18951 | NI/NI                     | -           | +           |
| JPT        | NA18973 | NI/NI                     | -           | +/-         |
| JPT        | NA18995 | NI/NI                     | -           | +/-         |
| JPT        | NA18999 | NI/NI                     | -           | +           |
| YRI        | NA18507 | NI/NI                     | -           | +           |
| YRI        | NA18508 | NI/NI                     | -           | +/-         |
| YRI        | NA18517 | NI/NI                     | -           | +/-         |
| YRI        | NA18855 | NI/NI                     | -           | +           |
| YRI        | NA18861 | NI/NI                     | -           | -           |
| YRI        | NA18871 | NI/NI                     | -           | +           |
| YRI        | NA18912 | NI/NI                     | -           | +           |
| YRI        | NA19103 | NI/NI                     | -           | +/-         |
| YRI        | NA19127 | NI/NI                     | -           | +           |
| YRI        | NA19130 | NI/NI                     | -           | +           |
| YRI        | NA19142 | NI/NI                     | -           | +           |
| YRI        | NA19144 | NI/NI                     | -           | +/-         |
| YRI        | NA19173 | NI/NI                     | -           | +/-         |
| YRI        | NA19203 | NI/NI                     | -           | -           |
| CEU        | NA06994 | NI/I                      | +/-         | +/-         |
| CEU        | NA07034 | NI/I                      | +/-         | +/-         |
| CEU        | NA10846 | NI/I                      | +/-         | -           |
| CEU        | NA10855 | NI/I                      | +/-         | +/-         |

| Population | DNA     | PFIDO/inveRision genotype | 19-bp indel | 27-bp indel |
|------------|---------|---------------------------|-------------|-------------|
| CEU        | NA11839 | NI/I                      | +/-         | +/-         |
| CEU        | NA11882 | NI/I                      | +/-         | +/-         |
| CEU        | NA11992 | NI/I                      | +/-         | +           |
| CEU        | NA12057 | NI/I                      | +/-         | +/-         |
| CEU        | NA12249 | NI/I                      | +/-         | +/-         |
| CEU        | NA12264 | NI/I                      | +/-         | +/-         |
| CEU        | NA12716 | NI/I                      | +/-         | +/-         |
| CEU        | NA12751 | NI/I                      | +/-         | +/-         |
| CHB        | NA18564 | NI/I                      | +/-         | +/-         |
| CHB        | NA18576 | NI/I                      | +/-         | +/-         |
| CHB        | NA18579 | NI/I                      | +/-         | +/-         |
| CHB        | NA18622 | NI/I                      | +/-         | +/-         |
| JPT        | NA18959 | NI/I                      | +/-         | +/-         |
| JPT        | NA18970 | NI/I                      | +/-         | +/-         |
| JPT        | NA18987 | NI/I                      | +/-         | +/-         |
| YRI        | NA18501 | NI/I                      | +/-         | +/-         |
| YRI        | NA18503 | NI/I                      | +/-         | +/-         |
| YRI        | NA18852 | NI/I                      | +/-         | +           |
| YRI        | NA18862 | NI/I                      | +/-         | +           |
| YRI        | NA19119 | NI/I                      | +/-         | +           |
| YRI        | NA19143 | NI/I                      | +/-         | -           |
| YRI        | NA19208 | NI/I                      | +/-         | +/-         |
| YRI        | NA19209 | NI/I                      | +/-         | +/-         |
| YRI        | NA19200 | NI/I                      | +/-         | +/-         |
| YRI        | NA19221 | NI/I                      | +/-         | +/-         |
| CEU        | NA10854 | I/I                       | +           | -           |
| CEU        | NA12006 | I/I                       | +           | -           |
| CEU        | NA12056 | I/I                       | +           | -           |
| CEU        | NA12145 | I/I                       | +           | -           |
| CEU        | NA12864 | I/I                       | +/-         | -           |
| CHB        | NA18608 | I/I                       | +           | -           |
| CHB        | NA18612 | I/I                       | +           | -           |

Concordant genotypes, both chromosomes

Both discordant chromosomes, 27bp indel

One discordant chromosome, 27bp indel

One discordant chromosome, 19bp indel

\*Other genotype, probably corresponding to two copies of the 27bp

### Table S2: Concordance between the predicted non-inverted (NI) or inverted (I) genotypes.

The table shows the concordance between the bioinformatic methods and the experimental genotypes (+ for insertion, - for deletion) obtained at the two *indel* polymorphisms within the region in 71 Hapmap individuals (142 chromosomes). Full concordance was observed in 141/142 chromosomes at the 19bp *indel* locus and 122/136 at the 27bp *indel* locus (green). A single non-concordant chromosome at the 19bp *indel* locus (yellow) and a total of 14/136 discrepant chromosomes at the 27bp *indel* -10 cases with one discrepant chromosome (light orange) and 2 with both discrepant chromosomes (dark orange)-, were found. Three YRI individuals carried an allele different from the two standard ones with an extra copy of the 27bp repeat.

| SNP ID     | Coordinate | LD    | EIFVar1/NI | EIFVar2/I | Chimp | Orang | Macaq | Denisova | Neand | San1029 | Yor927 | Han778 | Pap542 | French521 | Gene / location         |
|------------|------------|-------|------------|-----------|-------|-------|-------|----------|-------|---------|--------|--------|--------|-----------|-------------------------|
| rs149299   | 28.392.642 | 0.804 | T          | C         | T     | T     | T     | T        | T     | T/T     | T/T    | T/C    | T/T    | T/T       | <i>CLN3</i> intron      |
| rs180743   | 28.415.145 | 0.841 | C          | G         | G     | G     | G     | G        | G     | C/C     | G/G    | C/G    | C/G    | C/C       | <i>APOB48R</i> missense |
| rs26528    | 28.425.210 | 0.834 | T          | C         | C     | C     | T     | C        |       | T/C     | T/T    | T/C    | C/C    | T/T       | <i>IL27</i> intron      |
| rs28698667 | 28.440.572 | 0.975 | C          | T         | C     | C     | C     | T        | T     | C/T     | C/C    | C/T    | T/T    | C/C       | intergenic              |
| rs4788084  | 28.447.349 | 0.982 | C          | T         | C     | C     |       | T        |       | C/T     | C/C    | C/T    | T/T    | C/C       | intergenic              |
| rs12446550 | 28.450.882 | 0.980 | G          | A         | A     | A     |       | A        | A     | G/A     | G/G    | G/A    | A/A    | G/A       | intergenic              |
| rs4788073  | 28.502.050 | 0.832 | A          | G         | A     | A     | A     | G        |       | A/G     | A/A    | A/G    | A/G    | A/A       | <i>CCDC101</i> intron   |
| rs2008514  | 28.733.106 | 0.962 | C          | T         | T     | T     | T     | T        | T     | T/T     | C/C    | C/C    | T/T    | C/C       | intergenic              |
| rs8049439  | 28.745.016 | 0.945 | T          | C         | C     | T     | A     | C        | C     | T/C     | T/C    | T/T    | C/C    | T/T       | <i>ATXNL2</i> intron    |
| rs12928404 | 28.754.747 | 0.903 | T          | C         | C     | C     | T     | C        |       | T/C     | C/C    | T/T    | C/C    | T/T       | <i>ATXNL2</i> intron    |
| rs12325113 | 28.756.169 | 0.987 | T          | C         | T     | T     | T     | T        | T     | T/T     | T/T    | T/T    | T/T    | T/T       | intergenic              |
| rs4788099  | 28.763.228 | 0.989 | A          | G         | G     | G     | G     | G        | G     | A/G     | A/G    | A/G    | G/G    | A/A       | <i>TUFM</i> intron      |
| rs7187776  | 28.765.146 | 0.942 | A          | G         | G     |       | G     | G        |       | A/A     | A/G    | A/A    | G/G    | A/A       | <i>TUFM</i> 3'utr       |
| rs9972768  | 28.769.235 | 0.979 | A          | C         | A     | A     | A     |          | C     | A/C     | A/C    | A/A    | C/C    | A/A       | intergenic              |
| rs4788101  | 28.775.305 | 0.991 | C          | T         | T     | T     | T     | T        |       | C/T     | C/C    | C/C    | T/T    | C/C       | intergenic              |
| rs11861132 | 28.779.361 | 0.987 | A          | G         | G     |       | G     | G        | G     | A/G     | A/A    | A/A    | C/G    | A/A       | intergenic              |
| rs11861174 | 28.779.490 | 0.918 | A          | G         | G     | G     |       | G        |       | A/G     | A/A    | A/G    | G/G    | A/A       | intergenic              |
| rs4788102  | 28.780.899 | 0.991 | G          | A         | G     | G     |       | A        |       | G/A     | G/G    | G/G    | A/A    | A/A       | intergenic              |
| rs7193733  | 28.782.983 | 0.976 | A          | G         | G     |       | G     | G        | G     | A/A     | A/A    | A/A    | G/G    | A/G       | <i>SH2B1</i> 5'UTR      |
| rs7198606  | 28.782.623 | 0.991 | T          | G         | G     | G     | G     | G        | G     | G       | T/T    | T/T    | G/G    | G/T       | <i>SH2B1</i> 5'UTR      |
| rs7498665  | 28.790.742 | 0.939 | A          | G         | G     | G     | G     | G        | G     | A/G     | A/A    | A/A    | A/A    | A/A       | <i>SH2B1</i> missense   |
| rs11864107 | 28.793.432 | 0.970 | T          | C         | C     | T     | C     |          | C     | T/C     | T/T    | T/T    | C/C    | T/T       | intergenic              |
| rs3888190  | 28.796.987 | 0.987 | G          | T         | T     | T     | T     |          | T     | G/T     | G/G    | G/G    | T/T    | G/G       | intergenic              |
| rs8061590  | 28.802.631 | 0.991 | A          | G         | G     | G     | G     | G        |       | A/G     | A/A    | A/A    | G/G    | A/A       | <i>ATP2A1</i> intron    |

**Table S3: Genotypes at 24 representative SNPs on LD>0.8 with inversion haplotypes in the NI and I alleles.** The table shows data of Neanderthal, Denisova, non-human primates and representative individuals from modern human populations (San, Yoruba, Han, Papuan & French). The genotypes at the inversion allele coincidental with chimpanzee and Neanderthal or Denisova genotypes are labeled in yellow.

| Population | Frequency (%) | 95% CI      | HWE p-value |
|------------|---------------|-------------|-------------|
| ASW        | 18.1          | (12.7-25.0) | 1.0000      |
| CEU        | 35.8          | (30.6-41.2) | 0.8668      |
| CHB        | 14.9          | (10.0-21.4) | 0.5386      |
| CHD        | 11.8          | (7.5-17.8)  | 1.0000      |
| GIH        | 28.4          | (22.0-35.8) | 0.0168      |
| JPT        | 12.8          | (8.4-18.9)  | 0.5386      |
| LWK        | 13.3          | (8.9-19.4)  | 0.6936      |
| MXL        | 39.6          | (31.9-47.8) | 0.3429      |
| MKK        | 10.2          | (7.3-14.1)  | 1.0000      |
| TSI        | 27.3          | (34.6-21.0) | 0.2804      |
| YRI        | 18.6          | (23.2-14.6) | 0.2065      |

**Table S4: Frequency of inversion polymorphism in 16p11.2 across HapMap 3 populations.**

First column provides an estimation of inversion (I) allele frequencies per population, while second column shows their 95% confidence intervals. The following populations are included in the analysis: ASW: African ancestry in Southwest USA (n=83), CEU: Utah residents with Northern and Western European ancestry from the CEPH collection (n=165), CHB: Han Chinese in Beijing, China (n=84), CHD: Chinese in Metropolitan Denver, Colorado (n=85), GIH: Gujarati Indians in Houston, Texas (n=88), JPT: Japanese in Tokyo, Japan (n=86), LWK: Luhya in Webuye, Kenya (n=90), MXL: Mexican ancestry in Los Angeles, California (n=77), MKK: Maasai in Kinyawa, Kenya (n=171), TSI: Tuscans in Italy (n=88), YRI: Yoruba in Ibadan, Nigeria (n=167).

|                         | Controls |      | Cases |      | OR   | 95%-CI       | P-value |
|-------------------------|----------|------|-------|------|------|--------------|---------|
|                         | n        | %    | n     | %    |      |              |         |
| <b>ECRHS</b>            |          |      |       |      |      |              |         |
| <u>Asthma/Obese</u>     |          |      |       |      |      |              |         |
| NI/NI                   | 27       | 31,8 | 17    | 51,5 | 1    |              |         |
| NI/I + I/I              | 58       | 68,2 | 16    | 48,5 | 0,35 | (0.14, 0.84) | 0,0178  |
| <u>Asthma</u>           |          |      |       |      |      |              |         |
| NI/NI                   | 531      | 34,8 | 134   | 40,2 | 1    |              |         |
| NI/I + I/I              | 996      | 65,2 | 199   | 59,8 | 0,75 | (0.59, 0.96) | 0,0231  |
| <u>Obese/non-asthma</u> |          |      |       |      |      |              |         |
| NI/NI                   | 287      | 35   | 27    | 31,8 | 1    |              |         |
| NI/I + I/I              | 533      | 65   | 58    | 68,2 | 1,18 | (0.73, 1.91) | 0,49034 |
| <b>EGEA</b>             |          |      |       |      |      |              |         |
| <u>Asthma/Obese</u>     |          |      |       |      |      |              |         |
| NI/NI                   | 20       | 30,3 | 26    | 53,1 | 1    |              |         |
| NI/I + I/I              | 46       | 69,7 | 23    | 46,9 | 0,33 | (0.14, 0.77) | 0,0088  |
| <u>Asthma</u>           |          |      |       |      |      |              |         |
| NI/NI                   | 334      | 42   | 211   | 46,4 | 1    |              |         |
| NI/I + I/I              | 462      | 58   | 244   | 53,6 | 0,85 | (0.67, 1.07) | 0,1691  |
| <u>Obese/non-asthma</u> |          |      |       |      |      |              |         |
| NI/NI                   | 115      | 44,6 | 20    | 30,3 | 1    |              |         |
| NI/I + I/I              | 143      | 55,4 | 46    | 69,7 | 1,8  | (1.00, 3.24) | 0,0447  |
| <b>EGCUT</b>            |          |      |       |      |      |              |         |
| <u>Asthma/Obese</u>     |          |      |       |      |      |              |         |
| NI/NI                   | 23       | 20,9 | 27    | 32,5 | 1    |              |         |
| NI/I + I/I              | 87       | 79,1 | 56    | 67,5 | 0,45 | (0.22, 0.90) | 0,0227  |
| <u>Asthma</u>           |          |      |       |      |      |              |         |
| NI/NI                   | 213      | 25,7 | 105   | 27,1 | 1    |              |         |
| NI/I + I/I              | 616      | 74,3 | 283   | 72,9 | 0,95 | (0.72, 1.26) | 0,7175  |
| <u>Obese/non-asthma</u> |          |      |       |      |      |              |         |
| NI/NI                   | 97       | 24,9 | 23    | 20,9 | 1    |              |         |
| NI/I + I/I              | 292      | 75,1 | 87    | 79,1 | 1,09 | (0.63, 1.90) | 0,7625  |
| <b>COPDGene</b>         |          |      |       |      |      |              |         |
| <u>Asthma/Obese</u>     |          |      |       |      |      |              |         |
| NI/NI                   | 51       | 36,2 | 9     | 56,2 | 1    |              |         |
| NI/I + I/I              | 90       | 63,8 | 7     | 43,8 | 0,44 | (0.15, 1.32) | 0,1403  |
| <u>Asthma</u>           |          |      |       |      |      |              |         |
| NI/NI                   | 155      | 36,8 | 15    | 45,5 | 1    |              |         |
| NI/I + I/I              | 266      | 63,2 | 18    | 54,5 | 0,73 | (0.35, 1.51) | 0,3962  |
| <u>Obese/non-asthma</u> |          |      |       |      |      |              |         |
| NI/NI                   | 104      | 37,1 | 51    | 36,2 | 1    |              |         |
| NI/I + I/I              | 176      | 62,9 | 90    | 63,8 | 1,05 | (0.69, 1.61) | 0,8036  |
| <b>ACRN (SHRAP)</b>     |          |      |       |      |      |              |         |
| <u>Asthma/Obese</u>     |          |      |       |      |      |              |         |
| NI/NI                   | 51       | 36,2 | 63    | 46,3 | 1    |              |         |
| NI/I + I/I              | 90       | 63,8 | 73    | 53,7 | 0,62 | (0.38, 1.01) | 0,0542  |
| <u>Asthma</u>           |          |      |       |      |      |              |         |
| NI/NI                   | 155      | 36,8 | 187   | 42,5 | 1    |              |         |
| NI/I + I/I              | 266      | 63,2 | 253   | 57,5 | 0,78 | (0.59, 1.02) | 0,074   |
| <u>Obese/non-asthma</u> |          |      |       |      |      |              |         |
| NI/NI                   | 104      | 37,1 | 51    | 36,2 | 1    |              |         |
| NI/I + I/I              | 176      | 62,9 | 90    | 63,8 | 1,05 | (0.69, 1.60) | 0,8119  |

**Table S5: Association analyses between the 16p11.2 inversion with asthma, obesity and the joint occurrence of both genotypes in five independent studies.** The number and percentage of cases and controls with the studied phenotypes per inversion genotypes and per study are shown. The relative odds ratio (OR) under a dominant model with the confidence intervals (95%-CI) and the p-value for each association are also indicated. The threshold for significance after correcting for the analysis of different genetic models was set at 0.0227 (0.05/2.2) (the number of effective tests was 2.2, as described in the methods section).

| Gene          | Chr16 location    | NI/NI | NI/I | I/I | p-value  |
|---------------|-------------------|-------|------|-----|----------|
| <b>SPNS1</b>  | 28893596-28893596 | -     | ref  | +   | 1.04e-04 |
| <b>EIF3CL</b> | 28298400-28298400 | -     | ref  | +   | 1.09e-04 |
| IL32          | 3055313-3055313   | -     | ref  | -   | 3.44e-03 |
| QPRT          | 29597941-29597941 | -     | ref  | -   | 3.80e-03 |
| ZNF768        | 30442822-30442822 | -     | ref  | -   | 4.59e-03 |
| NOL3          | 65761905-65761905 | -     | ref  | -   | 7.02e-03 |
| MT2A          | 55199978-55199978 | -     | ref  | -   | 7.70e-03 |
| UBE2I         | 1299154-1299154   | -     | ref  | +   | 8.06e-03 |
| IRX6          | 53915971-53915971 | -     | ref  | -   | 9.27e-03 |
| MT1A          | 55230078-55230078 | -     | ref  | -   | 1.07e-02 |
| <b>TUFM</b>   | 28761232-28761232 | -     | ref  | +   | 1.11e-02 |
| ANKS3         | 4686511-4686511   | -     | ref  | -   | 1.17e-02 |
| COG7          | 23307314-23307314 | -     | ref  | -   | 1.35e-02 |
| HERPUD1       | 55523248-55523248 | -     | ref  | -   | 1.36e-02 |
| FLYWCH1       | 2901980-2901980   | -     | ref  | -   | 1.38e-02 |
| <b>IL27</b>   | 28418183-28418183 | -     | ref  | -   | 1.44e-02 |
| ZC3H7A        | 11751942-11751942 | -     | ref  | -   | 1.66e-02 |
| MAPK8IP3      | 1696221-1696221   | -     | ref  | -   | 2.04e-02 |
| FBRS          | 30583278-30583278 | -     | ref  | -   | 2.11e-02 |
| SRRM2         | 2742330-2742330   | -     | ref  | -   | 2.28e-02 |
| PRR14         | 30569741-30569741 | -     | ref  | -   | 2.41e-02 |
| TAOK2         | 29892688-29892688 | -     | ref  | -   | 2.44e-02 |
| SLC6A2        | 54247042-54247042 | +     | ref  | +   | 2.54e-02 |
| XYLT1         | 17103681-17103681 | -     | ref  | -   | 2.63e-02 |
| FAM65A        | 66120217-66120217 | -     | ref  | -   | 2.73e-02 |
| SPN           | 29581771-29581771 | -     | ref  | -   | 2.84e-02 |
| RSL1D1        | 11835555-11835555 | -     | ref  | -   | 2.91e-02 |
| MT1B          | 55243311-55243311 | -     | ref  | -   | 2.95e-02 |
| SYNGR3        | 1979946-1979946   | -     | ref  | -   | 3.11e-02 |
| PMM2          | 8799170-8799170   | -     | ref  | -   | 3.12e-02 |
| GDPD3         | 30023631-30023631 | -     | ref  | -   | 3.45e-02 |
| KREMEN2       | 2954217-2954217   | -     | ref  | -   | 3.54e-02 |
| YPEL3         | 30011135-30011135 | -     | ref  | -   | 3.56e-02 |
| HEATR3        | 48657381-48657381 | +     | ref  | +   | 3.66e-02 |
| ZNF646        | 30993243-30993243 | -     | ref  | -   | 3.72e-02 |
| SPN           | 29581771-29581771 | -     | ref  | -   | 3.89e-02 |
| ATP6V0C       | 2503727-2503727   | -     | ref  | -   | 3.92e-02 |
| NDRG4         | 57055049-57055049 | -     | ref  | -   | 3.94e-02 |
| SETD1A        | 30876115-30876115 | -     | ref  | -   | 3.97e-02 |
| PRSS36        | 31057747-31057747 | -     | ref  | -   | 3.98e-02 |
| ZNF263        | 3273487-3273487   | -     | ref  | -   | 4.03e-02 |
| MMP25         | 3036682-3036682   | -     | ref  | -   | 4.05e-02 |
| OTOA          | 21597335-21597335 | -     | ref  | -   | 4.18e-02 |
| ASPHD1        | 29819647-29819647 | +     | ref  | +   | 4.18e-02 |
| AGRP          | 66073974-66073974 | +     | ref  | -   | 4.40e-02 |
| NOD2          | 49288550-49288550 | -     | ref  | -   | 4.43e-02 |
| ZKSCAN2       | 25154822-25154822 | -     | ref  | -   | 4.53e-02 |
| TBL3          | 1962064-1962064   | -     | ref  | +   | 4.59e-02 |
| RBL2          | 52025851-52025851 | -     | ref  | -   | 4.64e-02 |
| DCUN1D3       | 20776896-20776896 | -     | ref  | -   | 4.87e-02 |

**Table S6: Expression analysis of chromosome 16 genes of RNA from lymphoblastoid cell lines of 105 CEU samples of HapMap 3, in relation to the inversion genotypes.** Only the top-deregulated genes are shown. Columns NI/NI, NI/I, and I/I show increases/decreases (+/-) in gene expression of the homozygous genotypes with respect to the heterozygous inversion (N/I) used as reference. The column 'p-value' gives the p-value of an ANOVA test comparing mean gene levels across inversion genotypes. In bold, the genes located within or immediately flanking the inversion region.

| Gene             | Chr16 location                       | NI/NI | NI/NI | I/I | p-value  |
|------------------|--------------------------------------|-------|-------|-----|----------|
| <b>TUFM</b>      | 28761848-28761897                    | -     | ref   | +   | 2.96e-40 |
| <b>SULT1A4</b>   | 29382990-29383039                    | +     | ref   | -   | 7.85e-31 |
| <b>SPNS1</b>     | 28903301-28903350                    | -     | ref   | +   | 4.20e-13 |
| <b>SULT1A1</b>   | 28538927-28538955:28541953-28541973  | -     | ref   | +   | 1.87e-07 |
| <b>CCDC101</b>   | 28510515-28510528: 28510529-28510564 | +     | ref   | -   | 2.21e-07 |
| <b>CCDC101</b>   | 28509634-28509683                    | +     | ref   | -   | 2.30e-05 |
| <i>FLJ12331</i>  | 67627108-67627157                    | +     | ref   | -   | 4.61e-04 |
| <i>HS.564975</i> | 3309854-3309903                      | -     | ref   | -   | 5.32e-04 |
| <b>APOB48R</b>   | 28417416-28417465                    | -     | ref   | +   | 6.90e-04 |
| <b>EIF3C</b>     | 28654505-28654552                    | -     | ref   | +   | 1.43e-03 |
| <i>COQ7</i>      | 18998559-18998608                    | -     | ref   | -   | 1.95e-03 |
| <i>ABCC11</i>    | 46758582-46758631                    | +     | ref   | +   | 2.32e-03 |
| <i>ZNF469</i>    | 87034341-87034390                    | -     | ref   | +   | 3.44e-03 |
| <i>HS.116279</i> | 79902090-79902139                    | +     | ref   | -   | 3.49e-03 |
| <i>FTSJD1</i>    | 69874424-69874473                    | -     | ref   | -   | 3.68e-03 |
| <i>HS.128031</i> | 24154944-24154957: 24166654-24166689 | +     | ref   | +   | 3.76e-03 |
| <i>LOC283867</i> | 63876501-63876550                    | -     | ref   | -   | 5.78e-03 |
| <i>OSGIN1</i>    | 82557082-82557113: 82557114-82557131 | -     | ref   | -   | 6.15e-03 |
| <i>HS.143909</i> | 64192713-64192762                    | -     | ref   | -   | 7.04e-03 |
| <i>LOC342346</i> | 4546492-4546541                      | +     | ref   | +   | 7.05e-03 |
| <i>HS.578925</i> | 9470399-9470448                      | +     | ref   | +   | 7.16e-03 |
| <i>HS.564922</i> |                                      | +     | ref   | +   | 7.60e-03 |

**Table S7: Expression analysis of chromosome 16 genes of RNA from peripheral blood cells of 882 Estonian samples of the EGCUT, in relation to the inversion genotypes.** Only the top-deregulated genes are shown. Columns NI/NI, NI/I, and I/I show increases/decreases (+/-) in gene expression of the homozygous genotypes with respect to the heterozygous inversion (N/I) used as reference. The column 'p-value' gives the p-value of an ANOVA test comparing mean gene levels across inversion genotypes. Gene names with the 'HS.' prefix are Illumina annotated genes, not included in the refSeq database. In bold, the genes located within or immediately flanking the inversion region.



**Table S8 (TableS8.xls):** Gene Expression analysis stratified by gender and BMI status. Each column provides the  $-\log$  p-value of association between gene expression and inversion in the EGCUT sample. P-values of association are also given stratified by gender (males and females) and BMI (lean:  $<18$ ; normal:  $[18 - 25)$ ; overweight:  $[25 - 30)$ ; obese:  $\geq 30$ ).

| <b>Gene</b>    | <b>Gender+BMI+Inversion</b> | <b>Gender</b> | <b>BMI</b> |
|----------------|-----------------------------|---------------|------------|
| <i>TUFM</i>    | 18.2                        | 0.1           | 1.5        |
| <i>SULT1A4</i> | 14.8                        | 0.01          | 0.05       |
| <i>SPNS1</i>   | 5.7                         | 0.01          | 0.01       |
| <i>SULT1A1</i> | 3.7                         | 0.01          | 0.01       |

**Table S9: Top-5 differentially expressed genes against polymorphic inversion 16p11.2, BMI, and gender.** The table lists the percentage of observed variability explained by the inversion, BMI and gender, for the top five genes expressed differentially with the inversion genotypes. Results correspond to the R<sup>2</sup> measure of a linear regression model.

## Acknowledgements by study

**Estonian Genome Center, University of Tartu (EGCUT):** EGCUT received financing from FP7 programs (ENGAGE, OPENGENE), targeted financing from Estonian Government SF0180142s08, Estonian Research Roadmap through Estonian Ministry of Education and Research, Center of Excellence in Genomics (EXCEGEN) and University of Tartu (SPIGVARENG). We acknowledge EGCUT technical personnel, especially Mr V. Soo and S. Smit. Data analyzes were carried out in part in the High Performance Computing Center of University of Tartu.

**European Community Respiratory Health Survey I, ECRHS-I:** The coordination of ECRHS II was supported by the European Commission, as part of their Quality of Life programme. The following bodies funded the local studies in ECRHS II: Albacete: Fondo de Investigaciones Santarias (FIS) (grants 97/0035-01, 99/0034-01, and 99/0034-02), Hospital Universitario de Albacete, Consejería de Sanidad; Barcelona: SEPAR, Public Health Service (grant R01 HL62633-01), Fondo de Investigaciones Santarias (FIS) (grants 97/0035-01, 99/0034-01, and 99/0034-02) CIRIT (grant 1999SGR 00241), Red Respira ISCIII; CIBER Epidemiología y Salud Pública (CIBERESP), Spain; Basel: Swiss National Science Foundation, Swiss Federal Office for Education & Science, Swiss National Accident Insurance Fund (SUVA), USC NIEHS Center grant 5P30 ES07048; Bergen: Norwegian Research Council, Norwegian Asthma & Allergy Association (NAAF), Glaxo Wellcome AS, Norway Research Fund; Erfurt: GSF-National Research Centre for Environment & Health, Deutsche Forschungsgemeinschaft (DFG) (grant code FR 1526/1-1); Galdakao: Basque Health Dept; Grenoble: Programme Hospitalier de Recherche Clinique-DRC de Grenoble 2000 no. 2610, Ministry of Health, Direction de la Recherche Clinique, CHU de Grenoble, Ministère de l'Emploi et de la Solidarite, Direction Generale de la Sante, Comite des Maladies Respiratoires de Ilserre; Hamburg: GSF-National Research Centre for Environment & Health, Deutsche Forschungsgemeinschaft (DFG) (grant code MA 711/4-1); Ipswich and Norwich: Asthma UK (formerly known as National Asthma Campaign); Huelva: Fondo de Investigaciones Santarias (FIS) (grant code: 97/0035-01, 99/0034-01 and 99/0034-02); Oviedo: Fondo de Investigaciones Santarias (FIS) (grant code: 97/0035-01, 99/0034-01 and 99/0034-02); Paris: Ministère de l'Emploi et de la Solidarite, Direction Generale de la Sante, UCB-Pharma (France), Aventis (France), Glaxo France, Programme Hospitalier de Recherche Clinique-DRC de Grenoble 2000 no. 2610, Ministry of Health, Direction de la Recherche Clinique, CHU de Grenoble; Tartu: Estonian Science Foundation; Umea: Swedish Heart Lung Foundation, Swedish Foundation for Health Care Sciences & Allergy Research, Swedish Asthma & Allergy Foundation, Swedish Cancer & Allergy Foundation; Uppsala: Swedish Heart Lung Foundation, Swedish Foundation for Health Care Sciences & Allergy Research, Swedish Asthma & Allergy Foundation, Swedish Cancer & Allergy Foundation; Financial support for ECRHS I for centers in ECRHS II was provided by: Ministère de la Sante, Glaxo France, Institut Pneumologique d'Aquitaine, Contrat de Plan Etat-Region Languedoc-Rousillon, CNMATS, CNMRT (90MR/10, 91AF/6), Ministre delegue de la sante, RNSP, France; GSF, and the Bundesminister für Forschung und Technologie, Bonn, Germany; Norwegian Research Council project no. 101422/310; Ministerio de Sanidad y Consumo FIS (grants number 91/0016060/00E-05E and 93/0393), and grants from Hospital General de Albacete, Hospital General Juan Ramón Jiménez, Consejería de Sanidad Principado de Asturias, Spain; The Swedish

Medical Research Council, the Swedish Heart Lung Foundation, the Swedish Association against Asthma and Allergy; Swiss National Science Foundation grant 4026-28099; National Asthma Campaign, British Lung Foundation, Department of Health, South Thames Regional Health Authority, UK. A.R. was supported by the Department of Health, UK and the European Commission as part of GABRIEL contract number 018996 under the Integrated Program LSH-2004-1.2.5-1.

**Epidemiological study on Genetics and Environment of Asthma, EGEA** The EGEA study was supported, in part, by grants from: Merck Sharp & Dohme (MSD), the Hospital Program of Clinical Research (PHRC-Paris, PHRC-Grenoble), National Research Agency, Health environment, health-work program (ANR 05-SEST-020-02/05-9-97), Biological collections for Health Program (ANR-06-CEBS), and ANR Public Health Research Program, French Agency of health safety, environment and work (AFSSET, EST-09-15), the national scientific committee of the medico-technology support at home (AGIR a' dom) and the Isere committee against 16 respiratory diseases (COMARES), the GA2LEN project, Global Allergy and Asthma European Network and GABRIEL, a multidisciplinary study to identify the genetic and environmental causes of asthma in the European Community (contract 018996 from the European Commission).

**The NCBI database of Genotypes and Phenotypes (dbGaP)** ([www.ncbi.nlm.nih.gov/gap](http://www.ncbi.nlm.nih.gov/gap)). Controlled-access genotype and phenotype data was obtained following authorization by the appropriate Data Access Committee to the following studies: the COPDGene cohort (dbGaP Study Accession number phs000179.v3.p2), and the National Heart, Lung, and Blood Institute SNP Health Association Asthma Resource Project – SHARP (dbGaP Study Accession number phs000166.v2.p1), that includes the Asthma Clinical Research Network (ACRN).
